# Supplementary material
Source: PubMed Central journal article supplement (PMC4862524)
Supplement: AAC.03119-15_zac005165116so1.pdf [file AAC.03119-15_zac005165116so1.pdf]

**Table S1.** PCR assays and primers

| <b>PCR</b> | <b>Oligo name</b>        | <b>5'-3' sequence</b> | <b>Amplicon size</b> | <b>Application</b> |
|------------|--------------------------|-----------------------|----------------------|--------------------|
| 1          | orf-phenol-hydroxylase-F | GGGCCGTACTGTAATCCAAA  | 2013 bp              | PCR & Seq          |
|            | sul2-R                   | TGGAAAACCGCGAATATCAT  |                      | PCR & Seq          |
| 2          | glmM-F                   | TCGGGCTATATGCTTGAACC  | 1616 bp              | PCR & Seq          |
|            | ISCR2                    | GCTGGAGCATGGCTTTCTAC  |                      | PCR & Seq          |
| 3          | floR-seg-F               | GTCCGATCCGATCTGTTTGT  | 1393 bp              | PCR & Seq          |
|            | IS1006-R                 | GAATGATTTGCCCCTGAAAA  |                      | PCR & Seq          |
| 4          | traA-F                   | CGTCCATTAATGCGTTCGTT  | 2595 bp              | PCR & Seq          |
|            | strB-out-seq             | CCCTGGGAACACATCAATCT  |                      | PCR & Seq          |
| 5          | strA-out-seq             | AATTGCCGTTATCACCAAGC  | 594 bp               | PCR & Seq          |
|            | MobS-like-R              | GCGTCTTTAGCCTGCTTTTG  |                      | PCR & Seq          |
| 6          | orf-duf4131-F            | ATCCTCAAGGCTGGCTATTG  | 707 bp               | PCR & Seq          |
|            | Tn2008-ATP-R             | GAGTCACTGGCGTGTTCTCA  |                      | PCR & Seq          |
| 7          | Tn2008-oxa-23-F          | GCGGCTTAGAGCATTACCAT  | 1569 bp              | PCR & Seq          |
|            | tnpR-R                   | TCCGATCTCTGCAAGGAACT  |                      | PCR & Seq          |
